# Supplementary material for: Antibacterial Property of Cellulose Acetate Composite Materials Reinforced with Aluminum Nitride
Source: MDPI journal article supplement (doi:10.3390/antibiotics10111292), 2021-10-22
Supplement: s1 [file s1]

## Article

# Antibacterial Property of Cellulose Acetate Composite Materials Reinforced with Aluminium Nitride

Thefye P. M. Sunthar <sup>1,2, \*</sup>, Francesco Boschetto <sup>1,3</sup>, Hoan Ngoc Doan <sup>5</sup>, Taigi Honma <sup>1</sup>, Kenji Kinashi <sup>5</sup>, Tetsuya Adachi <sup>3</sup>, Elia Marin <sup>1,3</sup>, Wenliang Zhu <sup>1</sup> and Giuseppe Pezzotti <sup>1,2,4,6</sup>

<sup>1</sup> Ceramic Physics Laboratory, Kyoto Institute of Technology, Sakyo-ku, Matsugasaki, Kyoto 606-8585, Japan; thefyeprasad@rocketmail.com (T.P.M.S.); boschetto-cesc@kit.ac.jp (F.B.); m0672026@edu.kit.ac.jp (T.H.); elia-marin@kit.ac.jp (E.M.); wlzhu@kit.ac.jp (W.Z.); pezzotti@kit.ac.jp (G.P.)

<sup>2</sup> Department of Immunology, Graduate School of Medical Science, Kyoto Prefectural University of Medicine Kamigyo-ku, 465 Kajii-cho, Kawaramachi dori, Kyoto 602-0841, Japan.

<sup>3</sup> Department of Dental Medicine, Graduate School of Medical Science, Kyoto Prefectural University of Medicine, Kamigyo-ku, Kyoto 602-8566, Japan; t-adachi@koto.kpu-m.ac.jp (T.A.)

<sup>4</sup> The Center for Advanced Medical Engineering and Informatics, Osaka University, Yamadaoka, Suita, Osaka 565-0871, Japan

<sup>5</sup> Faculty of Material Science and Engineering, Kyoto Institute of Technology, Sakyo-ku, Matsugasaki, Kyoto 606-8585, Japan; ngochoandoan@gmail.com (H.N.D.); kinashi@kit.ac.jp (K.K.)

<sup>6</sup> Department of Orthopedic Surgery, Tokyo Medical University, 6-7-1 Nishi-Shinjuku, Shinjuku-ku, Tokyo 162-8601, Japan.

\* Correspondence: thefyeprasad@rocketmail.com

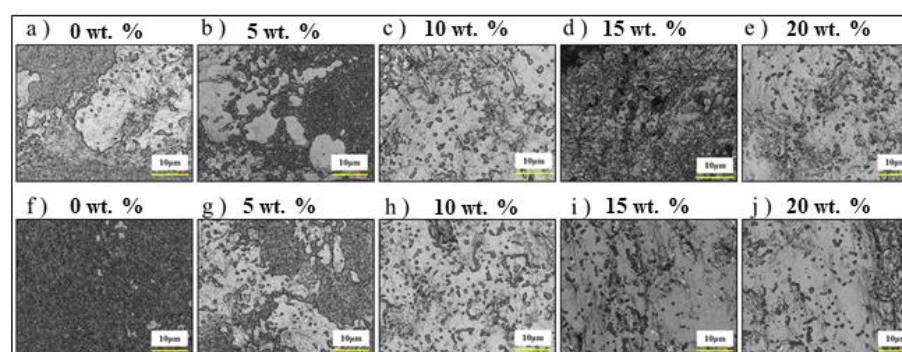

**Figure S1.** Microscopic images of *Staphylococcus epidermidis* biofilm formation on the different CA/AlN composites after 12 h (a-e), 24 h (f-j)

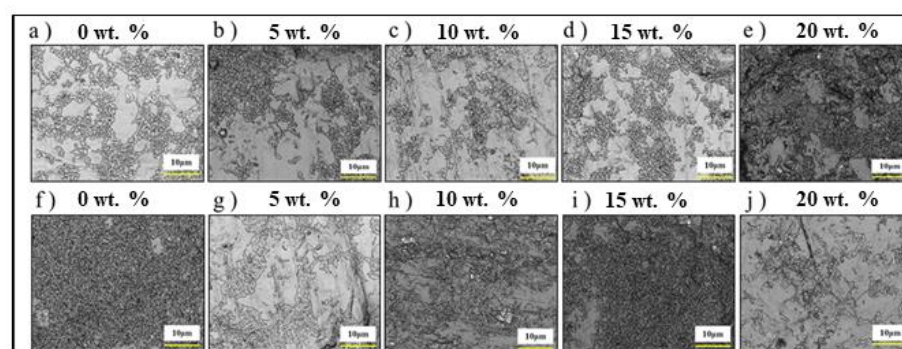

**Figure S2.** Microscopic images of *Escherichia coli* biofilm formation on the different CA/AlN composites after 12 h (a-e), 24 h (f-j)

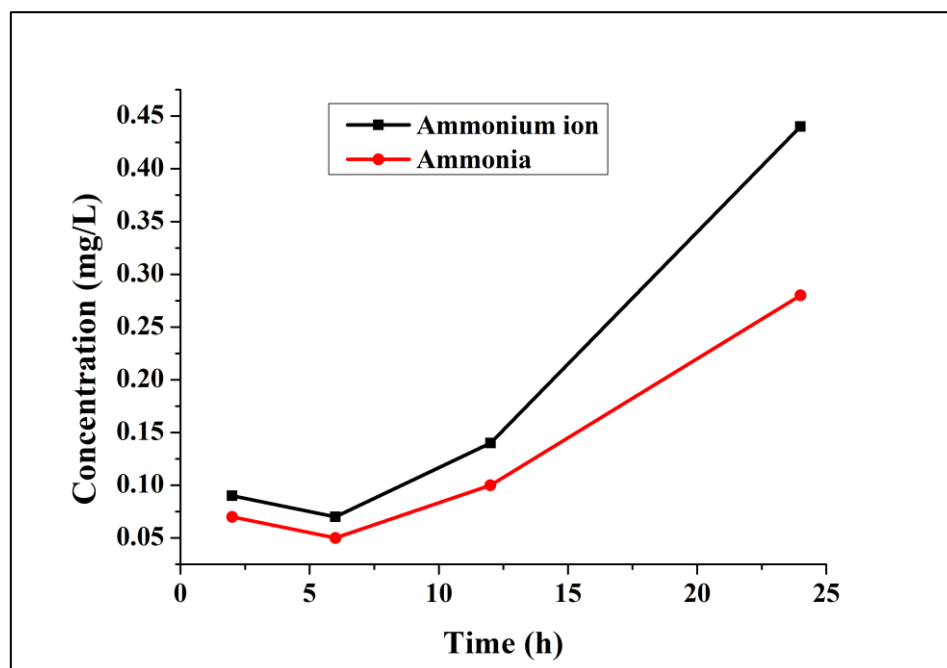

Figure S3: Quantification of Ammonium ion and Ammonia released during hydrolysis process of AlN at different time interval.

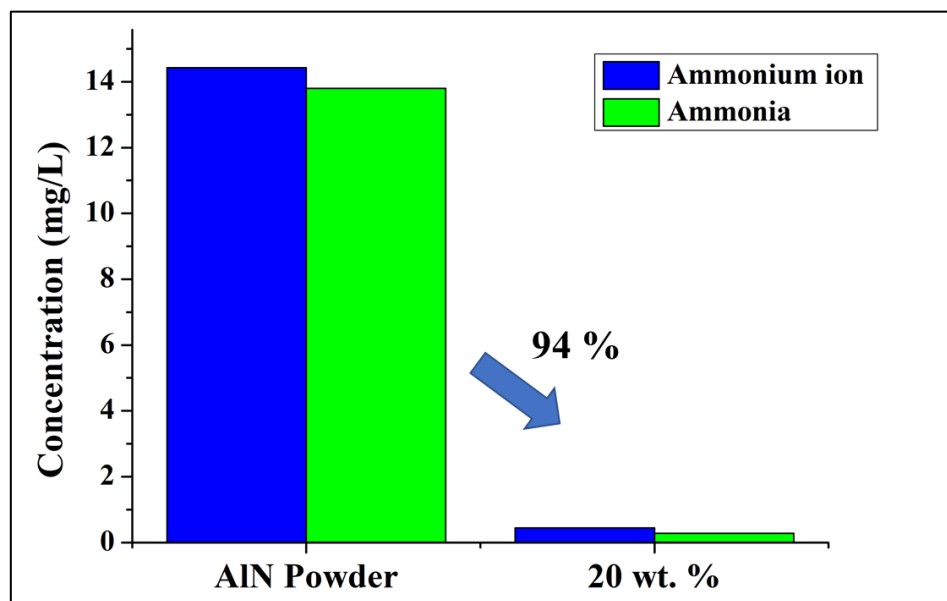

Figure S4: Comparison of Ammonium ion and Ammonia released by AlN powder and 20 wt. % CA/AlN composite.
